# Supplementary material for: A hybrid material assembled by anthocyanins from açaí fruit intercalated between niobium lamellar oxide
Source: Royal Society of Chemistry journal article supplement (doi:10.1039/b820610d), 2009-01-01
Supplement: b820610d.pdf [file b820610d.pdf]

## Electronic Supplementary Information to

### A Hybrid Material Assembled by Anthocyanins from Açai Fruit Intercalated between niobium lamellar oxide

Ângela Albuquerque Teixeira-Neto<sup>a</sup>, Ana Lucia Shiguihara<sup>a</sup>, Celly M. S. Izumi<sup>a</sup>, Marcos Augusto Bizeto<sup>b</sup>, Fabrice Leroux<sup>c</sup>, Marcia L. Arruda Temperini<sup>a</sup> and Vera R. Leopoldo Constantino<sup>\*a</sup>

<sup>a</sup> Instituto de Química, Universidade de São Paulo, Av. Prof. Lineu Prestes 748, CEP 05508-000, São Paulo-SP, Brazil.

<sup>b</sup> Departamento de Ciências Exatas e da Terra, Universidade Federal de São Paulo - Campus Diadema, Rua Prof. Artur Riedel, 275, CEP 09972-270, Diadema-SP, Brazil.

<sup>c</sup> Laboratoire des Matériaux Inorganiques, UMR CNRS 6002, Université Blaise Pascal, 24, avenue des Landais, 63177 Aubière Cedex, France.

Cyanidin-3-glucoside molecule possesses dimensions of 12 x 6.3 x 12 Å (Fig. S1) when in its most stable configuration (simulation carried on with the aid of Chem3D software, from CambridgeSoft Corp., using MM2 method).

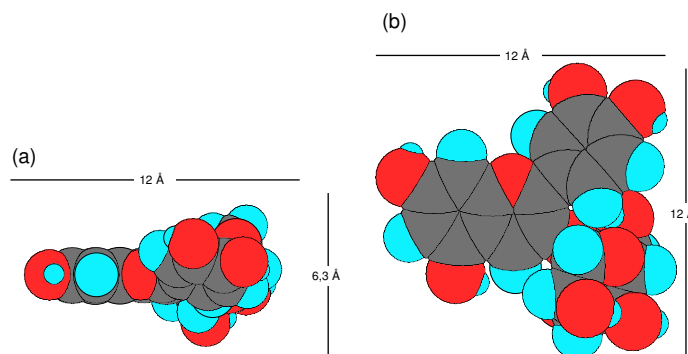

**Fig. S1.** Space-filling models of the cyanidin-3-glucoside molecule in its most stable configuration.

Fig. S2 shows pictures of dye-hex<sub>exf</sub> 80mL/g sample before and after heating process at 170°C under air atmosphere in the TG-DSC furnace (Netzsch thermoanalyser model TG/DSC 490 PC Luxx). No color changes were observed.

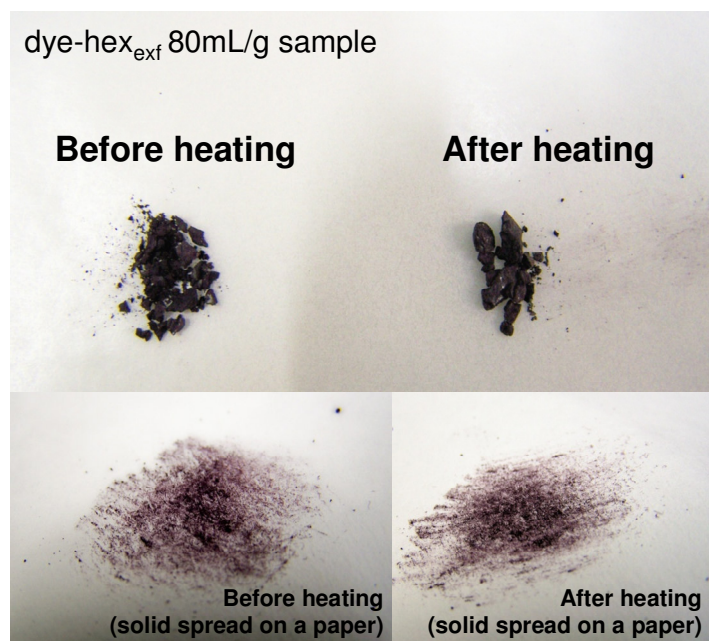

**Fig. S2.** Pictures of dye-hex<sub>exf</sub> 80mL/g sample before (left) and after (right) heating process at 170°C under air.

Fourier transform infrared spectra (FTIR) were recorded on a Bomem spectrophotometer, model MB-102, with a reflectance accessory; the samples were diluted in solid KBr. FTIR spectra of dye-hexaniobate samples are presented in Fig. S3. The spectra of both dye-hex<sub>ext</sub> sample (Fig. S3a) and dye-hex<sub>int</sub> material (Fig. S3b) are very similar, although the spectra of their precursors are very different between them.

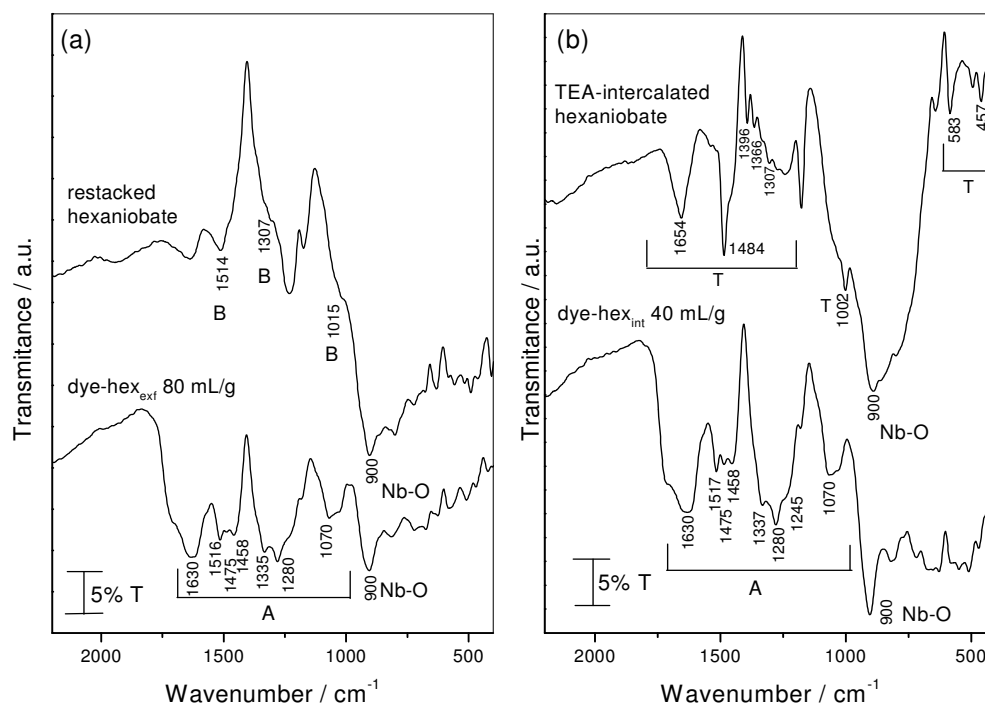

**Fig. S3.** FTIR spectra of (a) dye-hex<sub>ext</sub> sample and (b) dye-hex<sub>int</sub> sample. For comparison purposes, FTIR spectra of their respective precursors are also shown

The bands at about 1070 cm<sup>-1</sup> ( $\delta_{C-H}$ ), 1245 and 1280 cm<sup>-1</sup> ( $\nu_{C-O}$  from phenols), 1335 cm<sup>-1</sup> ( $\nu_{C-C}$  inter-ring), 1458, 1475, 1516 and 1630 cm<sup>-1</sup> ( $\nu_{C-C}$  from ring stretching) are due to anthocyanin group (marked with A) and are in agreement to the FTIR spectra of some hydroxyflavylium derivatives previously reported.<sup>1</sup> FTIR spectra of hybrid samples also show absorption bands that can be correlated to sugar units such as glucose.<sup>2</sup> The absorption band at 900 cm<sup>-1</sup> ( $\nu_{Nb-O}$ ) and in the 500-700 cm<sup>-1</sup> range are assigned to the inorganic phase.<sup>3,4</sup> Bands marked with B and T are due to n-butylamine or TEA<sup>+</sup> cations in

the precursors samples respectively (Fig. S3).

Field emission scanning electron microscopy (FEG-SEM) images of carbon coated samples were obtained in a JEOL microscope, model JSM-7000F, at the Instituto de Química (Universidade de São Paulo - USP). FEG-SEM images of dye-hexaniobate hybrids (Fig. S4) reveal the presence of platelets in a face-to-face array in both dye-hex<sub>ext</sub> (Fig. S4a) and dye-hex<sub>int</sub> (Fig. S4b) samples. This kind of morphology corroborates the supposition that exfoliated hexaniobate layers are restacked when in presence of the cation dye, leading to a face-to-face oriented layered material with morphology similar to that observed for dye-hex<sub>int</sub> sample.

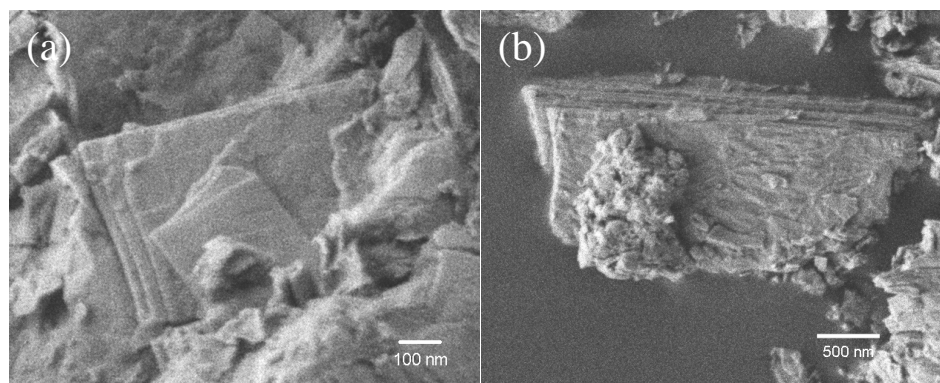

**Fig. S4.** SEM images of (a) dye-hex<sub>ext</sub> 80mL/g sample and (b) dye-hex<sub>int</sub> sample.

## References

1. J.C. Merlin, J.P. Cornard, A. Stastoua and M. Saidi-Idrissi, *Spectrochim. Acta*, 1994, **50A**, 703.
2. M. Kacurakova and M. Mathlouthi, *Carbohydr. Res.*, 1996, **284**, 145.
3. J.M. Jehng and I.E. Wachs, *Chem. Mater.*, 1991, **3**, 100.
4. M.A. Bizeto, F.P. Christino, M.F.M. Tavares and V.R.L. Constantino, *Quim. Nova*, 2006, **29**, 1215.
